# Supplementary material
Source: PubMed Central journal article supplement (PMC3302472)
Supplement: supp_194.7.1730_TableS1-S2_FigS1-S2.pdf [file supp_194.7.1730_TableS1-S2_FigS1-S2.pdf]

**Fur-Mediated Activation of Gene Transcription in the Human Pathogen**  
***Neisseria gonorrhoeae***

Chunxiao Yu<sup>1</sup> and Caroline Attardo Genco<sup>1,2\*</sup>

Department of Medicine, Section of Infectious Diseases<sup>1</sup>, and Department of  
Microbiology<sup>2</sup>, Boston University School of Medicine, Boston, MA 02118, United  
States

\*For correspondence. Department of Medicine, Section of Infectious Diseases,  
Boston University School of Medicine, 650 Albany Street, Room 626, Boston, MA  
02118, United States

E-mail: cgenco@bu.edu. Tel: 617-414-5305. Fax: 617-414-5298.

**Running title:** Fur functions as a transcriptional activator

**Keywords:** Fur, transcriptional activation, *Neisseria gonorrhoeae*

**Supplementary Table 1. The primers used in RT-PCR of the putative Fur activated genes.**

| <b>Primers</b> | <b>Sequence</b>       | <b>Replicon size</b> |
|----------------|-----------------------|----------------------|
| rmp_Fw         | GTTACGATGCTGCGGATTTT  | 407 bp               |
| rmp_Rv         | GAAACCATTTCCCTGTCTGC  |                      |
| N37_368_Fw     | TGTCGCAAGTCGATATTTCC  | 223 bp               |
| N37_590_Rv     | TTGATTTCTTTACGCCTTG   |                      |
| N43_RT_Fw      | AAATGGCTGGATACGCAACT  | 176 bp               |
| N43_RT_Rv      | GCATCGACGTTGTTCTGTTC  |                      |
| 76_RT_FW       | GCTCACAACCGGAGTATGG   | 186 bp               |
| 76_RT_Rv       | TGGATTTGATTTFCGGTTTCA |                      |
| N199_22_Fw     | ACCCTGCACATTTCCAAACT  | 235 bp               |
| N199_256_Rv    | TTTGAGTGGGCGAGACATAG  |                      |
| N233_21_Fw     | ACTGATTGCCCTCGCACT    | 235 bp               |
| N233_255_Rv    | GCCGATGCTGTAAAGTTTGA  |                      |
| N376_41_Fw     | AACTCGATTTTCGACAAAGCC | 216 bp               |
| N376_256_Rv    | CCATGGCGATGGTGTATTTA  |                      |
| 432_RT_FW      | TGGAAACTGGAAACTTCCCT  | 179 bp               |
| 432_RT_Rv      | GTCAGTCCGTAGCGCAAAC   |                      |
| N575_19_Fw     | AACCAAACACCAAACGACCT  | 209 bp               |
| N575_227_Rv    | CCCATACCGAAGCCTATTTTC |                      |
| 711_RT_FW      | TCGTATCCTCGGTCATGAAG  | 190 bp               |
| 711_RT_Rv      | CGTGCCGTCAATCATATAGC  |                      |
| N775_1908_Fw   | GGGTAAAGGCATGATCCAGT  | 212 bp               |
| N775_2119_Rv   | ACACCATCGCCAAAGTCATA  |                      |
| N794_RT_Fw     | GGAAGAAGAAACCACACACG  | 195 bp               |
| N794_RT_Rv     | TAGTCTTGAGCCTCTTCGCA  |                      |
| N904_RT_Fw     | GGTCAGCCTGCCTATTCATC  | 175 bp               |
| N904_RT_Rv     | CCGCTTTGGATTTCGTATTCT |                      |
| 1205_RT_FW     | TTCGGCAACTACATTTACGC  | 196bp                |
| 1205_RT_Rv     | TCAGACGGCCTCGTACATAG  |                      |
| N1207_RT_Fw    | TATGTCGAGAGCCTGTCTGC  | 166 bp               |
| N1207_RT_Rv    | GGTAGTCGTGGATTTCCGTT  |                      |
| 1275_RT_Fw     | ATTGGGCAAATACGTCTTCC  | 177 bp               |
| 1275_RT_Rv     | GATTGGATGTGCCAAGTACG  |                      |
| N1276_RT_Fw    | TGGAATACCGCTACTGGACA  | 208 bp               |
| N1276_RT_Rv    | GCTTTGAAGCTGAATGTGGA  |                      |
| 1282_RT_Fw     | TGGAGGTGGTAAGATTGTGC  | 195bp                |
| 1282_RT_Rv     | AACGTCCGGCAGACATAAA   |                      |
| 1290_RT_Fw     | GCATCCTGTTTCAGCAAGGTA | 200bp                |
| 1290_RT_Rv     | AGAAGGTCAGACACATGGCA  |                      |
| 1317_RT_Fw     | GACGGCGTAAAGGCAGAC    | 175 bp               |
| 1317_RT_Rv     | GGGCTATCGGCATAAACAAT  |                      |
| 1430_RT_Fw     | CCACATCTCCAAACTCAACG  | 183 bp               |
| 1430_RT_Rv     | TCGTGTTTGAGCGAGAAATC  |                      |
| N1685_306_Fw   | CCAATTCAACACCTTTGTCTG | 207 bp               |
| N1685_512_Rv   | ATAAATTCATCGCTGCTTGC  |                      |
| N1751_RT_Fw    | CAAGGATGAAGTTCGACGTG  | 153 bp               |
| N1751_RT_Rv    | TCAGGACGACGATAAACACC  |                      |
| N1788_902_Fw   | GTCTGACCACGCACGAATAC  | 239 bp               |
| N1788_1140_Rv  | GGCTTCTTCATAGCCTGTCTG |                      |
| N1789_206_Fw   | AAGAAATCGCAAGCCTCAAC  | 224 bp               |
| N1789_429_Rv   | TGCGTACATTTCCGCATC    |                      |
| N1842_RT_Fw    | AATCTTCGAACTGGCTACCG  | 185 bp               |
| N1842_RT_Rv    | CTTTCAGACCGACGATTTCA  |                      |

|               |                       |        |
|---------------|-----------------------|--------|
| 1850_RT_Fw    | GCGAACATCCGATTATGTTG  | 164 bp |
| 1850_RT_Rv    | TGGAACGTGTACTGCCATTT  |        |
| N1851_3956_Fw | GTTTCGGTGAGATGGAGGTT  | 208 bp |
| N1851_4163_Rv | TCGATATCCAAACCCAGTGA  |        |
| 1859_RT_Fw    | CTTCGTCAATCAGGATGCAG  | 178 bp |
| 1859_RT_Rv    | ATTACCGACGAGTGCATCAA  |        |
| N1865_RT_Fw   | TGCTTCAGGATGAAGATTTCC | 199 bp |
| N1865_RT_Rv   | GACACGGTAGGAATGCCTTT  |        |
| 1913_RT_Fw    | CCGCACAACAAGCAAATAT   | 244 bp |
| 1913_RT_Rv    | AAGATGCCTTTACGCTTTGC  |        |
| N1937_99_Fw   | TCGGTGGGTATCACTGATGT  | 248 bp |
| N1937_346_Rv  | CAATCCAACCTGCAAATCCTG |        |
| 1957_RT_Fw    | ATCGTAATCGGTTTCGGTTTC | 185 Bp |
| 1957_RT_Rv    | CCGATGAGGTAAAGGACGAT  |        |
| N1960_101_Fw  | GCGAGGATGATGACAAACAG  | 158 bp |
| N1960_258_Rv  | AGCGGGACCGTGTTTAAG    |        |
| N2011_RT_Fw   | AAGTGTCCGCTATGTCGAA   | 180 bp |
| N2011_RT_Rv   | GGAACAAGGCTTCATTGGTT  |        |
| 2068_RT_Fw    | AAACCTGATTATCCGCCCTA  | 173 bp |
| 2068_RT_Rv    | ACCAGATATGTTTCGGGCAGT |        |
| 2116_RT_Fw    | TTGATTGAAGGACGGGATTT  | 181 bp |
| 2116_RT_Rv    | AAACCAAATCGCGAATAACC  |        |
| 2137_RT_Fw    | AAATTCAAGACGGCGAAATC  | 187 bp |
| 2137_RT_Rv    | TGAAACACCATGCCGATATT  |        |
| N2162_181_Fw  | CAACAAACATTCCTCGATGC  | 212 bp |
| N2162_392_Rv  | GTCGGATCGATGAAATACCA  |        |

**Supplementary Table 2. The primers used for amplifying the probes containing the putative promoter region of each gene for EMSA.**

| Primers           | Sequences                      | Length of probe | Positions* |
|-------------------|--------------------------------|-----------------|------------|
| fur_1300_BamHI_Fw | GGTCAGGATCCTGCGTTCTTTGAT       | 505 bp          | -305~+200  |
| fur_HindIII_R3    | TTTAAGCTTTCATAATATTCAA         |                 |            |
| rmp-BamHI_Fw      | CGGGATCCGAATTCCTATCCGATTTGCCG  | 100 bp          | -95~-1     |
| rmp_pHindIII_Rv   | CCAAGCTTTTATTCCCTCATTAGATTTGTA |                 |            |
| 37_pBamHI_Fw      | TTTGGATCCGCATAACAGCCGA         | 504 bp          | -491~+3    |
| 37_pHindIII_Rv    | GGGAAGCTTCATGGTTTGTGTC         |                 |            |
| 43_pBamHI_Fw      | GGGGGATCCATACAAACAGAAAG        | 527 bp          | -500~+17   |
| 43_pHindIII_Rv    | GGGAAGCTTATTTGTTGGTAGGG        |                 |            |
| 76_pBamHI_Fw      | TTTGGATCCAAACCGCCGCAATC        | 436 bp          | 403~+23    |
| 76_pHindIII_Rv    | TTTAAGCTTCTGCCGGTTCGGTCTG      |                 |            |
| 199_pBamHI_Fw     | TTTGGATCCCTCGAACGACATGA        | 527 bp          | -500~+17   |
| 199_pHindIII_Rv   | TTTAAGCTTAATTCGGAGACGTG        |                 |            |
| 233_pBamHI_F4     | TTTGGATCCAAACCCGCCCGAAC        | 452 bp          | -413~+29   |
| 233_pHindIII_R2   | GGGAAGCTTGCAATCAGTGC GGCAAG    |                 |            |
| 575_pBamHI_Fw     | TTTGGATCCAGGCAGAGCAGCTT        | 527 bp          | -500~+17   |
| 575_pHindIII_Rv   | TTTAAGCTTTCGGGGGTGTCTGT        |                 |            |
| 711_pBamHI_Fw     | TTTGGATCCGCCACAACGACA          | 467 bp          | -397~+60   |
| 711_pHindIII_Rv   | TTTAAGCTTCGGGCGGGGTTTTTC       |                 |            |
| 775_pBamHI_Fw     | TGTGGATCCGGGCGGCGATATC         | 503 bp          | -492~-1    |
| 775_pHindIII_Rv   | GGGAAGCTTCATGGATACTCTC         |                 |            |
| 794_pBamHI_F      | AGATGGATCCTTAGTTTTAGCAGC       | 233 bp          | -210~+13   |
| 794_pHindIII_R    | CAAAAGCTTGATTGCCTTGCAT         |                 |            |
| 869_pBamHI_Fw     | TTTGGATCCGCGAAGCCTTCTAT        | 527 bp          | -500~+17   |
| 869_pHindIII_Rv   | GGGAAGCTTATCACAGAAGCAAG        |                 |            |
| 904_pBamHI_Fw     | GGGGGATCCGCCAAATAACTGCT        | 527 bp          | -500~+17   |
| 904_pBamHI_Fw     | GGGAAGCTTGGAATGGTTGCGCT        |                 |            |
| 1189_pBamHI_Fw    | TTTGGATCCGGGCGGGGGCTC          | 525 bp          | -500~+15   |
| 1189_pHindIII_Rv  | GGGAAGCTTGGCGGTTTGATT          |                 |            |
| 1205_pBamHI_Fw    | TTTGGATCCGCACGGCGACTTCCTG      | 503 bp          | -477~+16   |
| 1205_pHindIII_Rv  | TTTAAGCTTGGCTTCTCGTCGATT       |                 |            |
| 1207_pBamHI_F2    | TTTGGATCCGGCAGGCGATTTTG        | 484 bp          | -472~-2    |
| 1207_pHindIII_R2  | TTTAAGCTTGGATGCCGCTGAA         |                 |            |
| 1275_pBamHI_Fw    | TTTGGATCCAGAAAAGTAGGGGG        | 527 bp          | -500~+17   |
| 1275_pBamHI_Fw    | GGGAAGCTTATATCGTCTTTCGT        |                 |            |
| 1282_pBamHI_Fw    | TTTGGATCCGTTACGGTGGTGA         | 527 bp          | -500~+17   |
| 1282_pHindIII_Rv  | GGGAAGCTTGATGCCGTCTGAA         |                 |            |
| 1317_pBamHI_Fw    | TTTGGATCCCACGCCGCGACA          | 526 bp          | -500~+16   |
| 1317_pHindIII_Rv  | GGGAAGCTTAGTGTGTTATCTT         |                 |            |
| 1430_pBamHI_Fw    | GGGGGATCCGCCAAAGCCGAAGCAC      | 457 bp          | -393~+54   |
| 1430_pHindIII_Rv  | GGGAAGCTTGGCGCAACGGAAAA        |                 |            |
| 1685_pBamHI_F2    | AAAGGATCCGCGCCTGAAATT          | 476 bp          | -473~-8    |
| 1685_pHindIII_R   | AAAAAGCTTTCGGAAAGGC            |                 |            |
| 1751_pBamHI_Fw    | TTTGGATCCGGATTTAACCGTC         | 527 bp          | -500~+17   |
| 1751_pHindIII_Rv  | GGGAAGCTTAAATAAGCGGACA         |                 |            |
| 1788_pBamHI_Fw    | TTTGGATCCTATCGGCAACTAT         | 526 bp          | -500~+16   |
| 1788_pHindIII_Rv  | GGGAAGCTTTTGGGGTAAAT           |                 |            |
| 1823_pBamHI_Fw    | TTTGGATCCGATCAAGCACGA          | 540 bp          | -500~+30   |
| 1823_pHindIII_R2  | GGGAAGCTTAACAGCAGGTTGAA        |                 |            |
| 1842_pBamHI_F4    | CCCGGATCCTTCCAATTGGCATTGAA     | 507 bp          | -442~+55   |
| 1842_pHindIII_R2  | TTTAAGCTTCGATGGTGCCAACGTTA     |                 |            |

|                  |                                       |        |          |
|------------------|---------------------------------------|--------|----------|
| 1850_pBamHI_F3   | <u>TTTGGATCC</u> GCACGCGGTTCTACC      | 504 bp | -443~+41 |
| 1850_pHindIII_R2 | TTT <u>AAGCTT</u> CCTGCGGTTTGCAACG    |        |          |
| 1851_pBamHI_F3   | <u>TTTGGATCC</u> GCTGGTGCCGGTGCT      | 495 bp | -430~+55 |
| 1851_pHindIII_R2 | TTT <u>AAGCTT</u> CCCGCTTTGCAAACTCT   |        |          |
| 1859_pBamHI_F2   | <u>TTTGGATCC</u> TTAGCCATGGCAATATCC   | 493 bp | -426~+57 |
| 1859_pHindIII_R2 | TTT <u>AAGCTT</u> CCCCGAAACCCATGACG   |        |          |
| 1865_pBamHI_Fw   | GGGG <u>GATCC</u> GAAAGCCAA           | 523 bp | -500~+15 |
| 1865_pHindIII_Rv | GGGA <u>AAGCTT</u> CGTCCTCTGT         |        |          |
| 1913_pBamHI_F2   | <u>TTTGGATCC</u> GACGGCATCTGTTTGACG   | 419 bp | -356~+53 |
| 1913_pHindIII_R2 | TTT <u>AAGCTT</u> TTGGAACCTGTGGGGATGA |        |          |
| 1937_pBamHI_F2   | <u>TTTGGATCC</u> GAAACTTTCAGGCGACTTTG | 247 bp | -213~+26 |
| 1937_pHindIII_R2 | TTT <u>AAGCTT</u> CCCGTTCACACCTAAACGA |        |          |
| 1960_pBamHI_F2   | <u>TTTGGATCC</u> GGGATTGATGTTGATGC    | 504 bp | -480~+14 |
| 1960_pHindIII_Rv | TTT <u>AAGCTT</u> CGCGCCCCAAAC        |        |          |
| 2011_pHindIII_R  | GGGA <u>AAGCTT</u> AGTTCATCAGAAATC    | 504 bp | -486~+8  |
| 2011_pBamHI_F2   | <u>TTTGGATCC</u> CGGCAGCTACGAG        |        |          |
| 2068_pBamHI_Fw   | <u>TTTGGATCC</u> GAAACGCTCGC          | 525 bp | -500~+15 |
| 2068_pHindIII_Rv | GGGA <u>AAGCTT</u> AATCAGGGAGGT       |        |          |
| 2116_pBamHI_Fw   | GGGG <u>GATCC</u> ACGCGCGTATTC        | 525bp  | -500~+15 |
| 2116_pHindIII_Rv | GGGA <u>AAGCTT</u> CGGGAAGACGGG       |        |          |
| 2137_pBamHI_Fw   | <u>TTTGGATCC</u> GGTTCGGCAGTTT        | 526 bp | -500~+16 |
| 2137_pHindIII_Rv | GGGA <u>AAGCTT</u> GTCCAAAATAAT       |        |          |
| 2162_pBamHI_Fw   | GGGG <u>GATCC</u> AGAAGAGTGGGA        | 525 bp | -500~+15 |
| 2162_pHindIII_Rv | GGGA <u>AAGCTT</u> GTGGTGAGTGTT       |        |          |

**\*Positions:** The Positions of each PCR product are relative positions to the translational start codon ATG of the gene, which is defined as +1 in this case.

**\*\*BamHI and HindIII sites are underlined in each primer.**

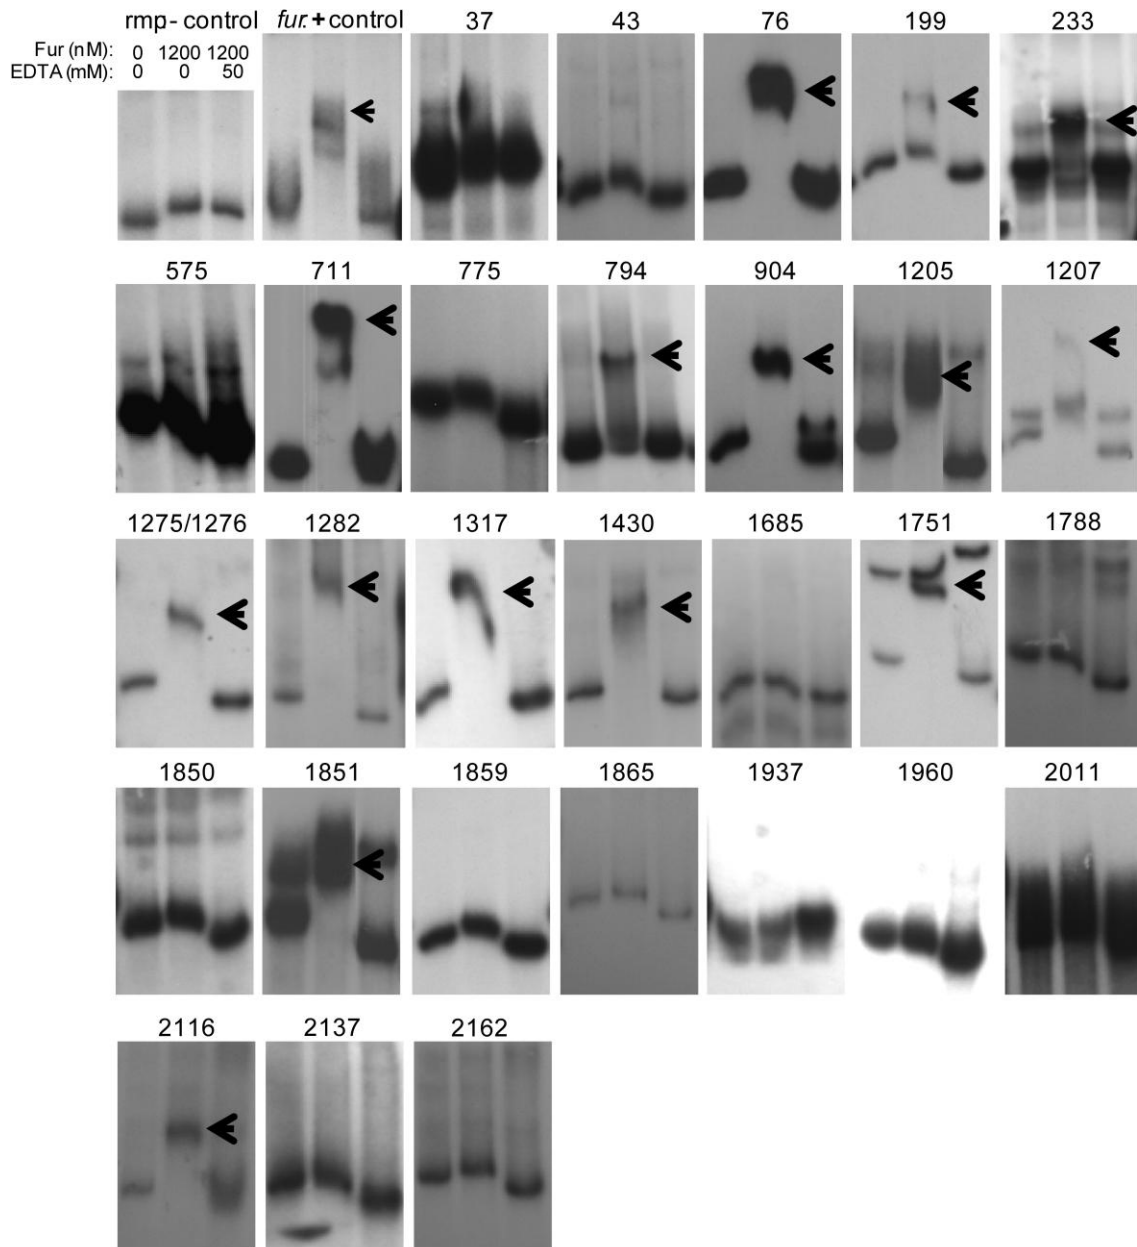

**Supplementary Figure 1. Binding of Fur to the putative promoter regions of the iron-activated genes of strain F62 *in vitro*.** Electrophoretic mobility shift assay (EMSA) of <sup>32</sup>P-labeled putative promoter DNA after the incubation with Fur. The shift of the Fur-bound promoter is indicated by an arrow. On each panel, Lane 1, free DNA without the addition of Fur; Lane 2, 1200 nM Fur; and Lane 3, 1200 nM Fur + 50 mM EDTA. The gene designations of *N. gonorrhoeae* F62 were assigned according to their homologue in *N. gonorrhoeae* FA1090.

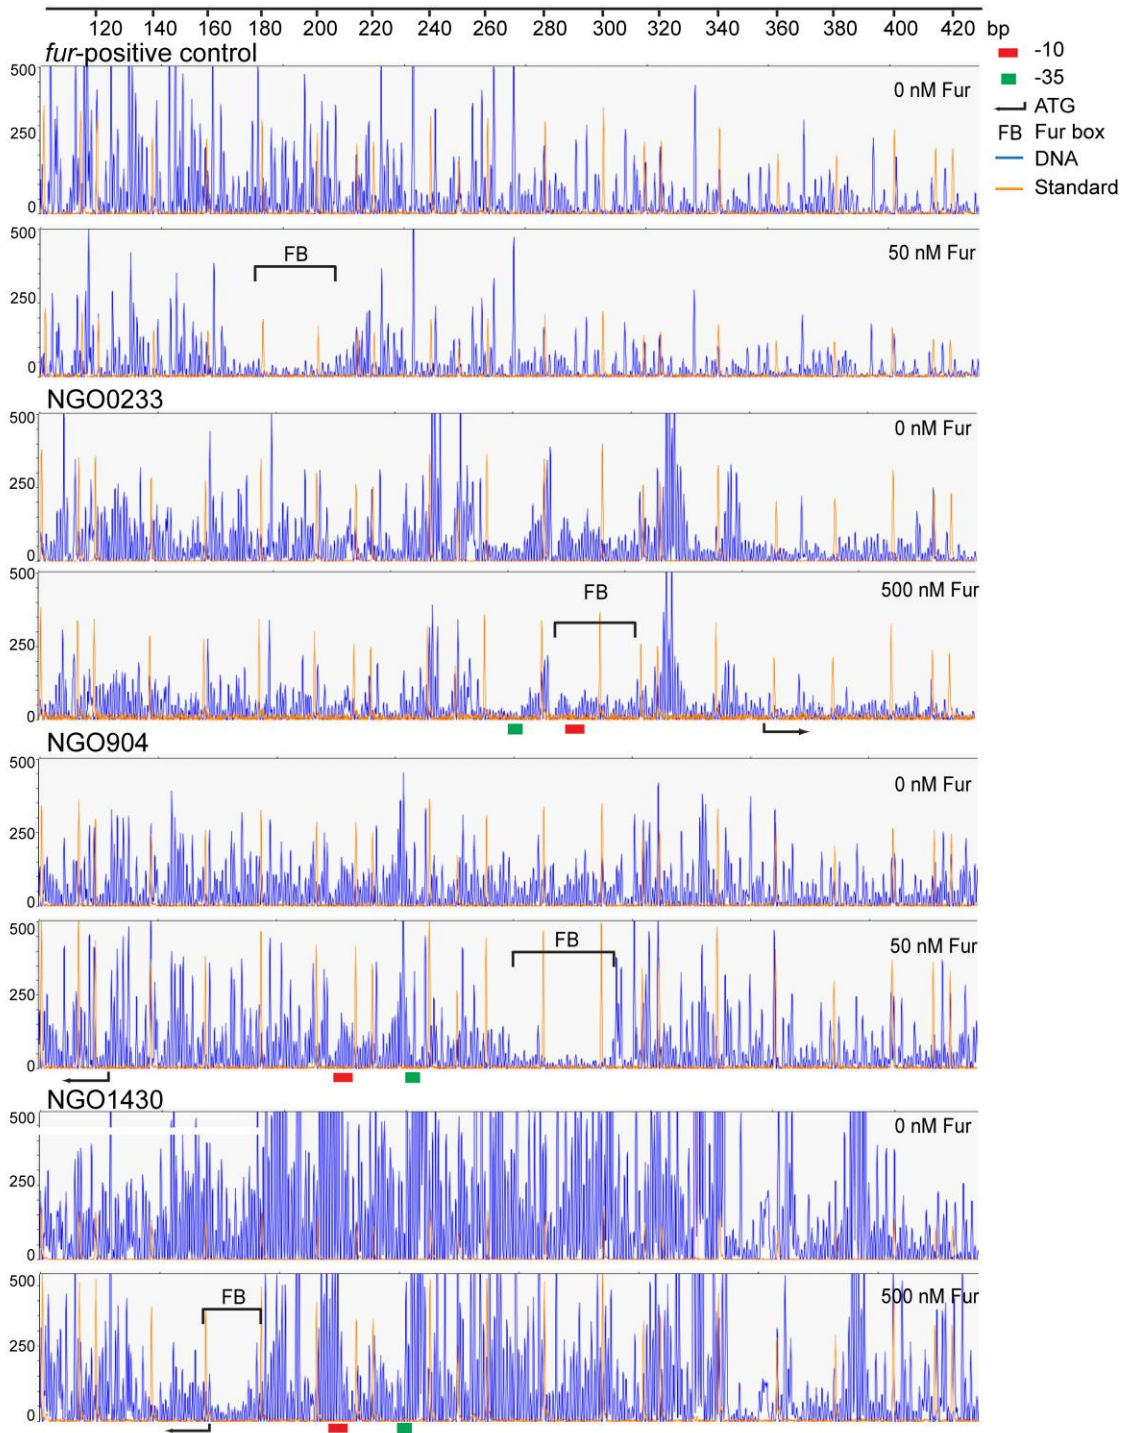

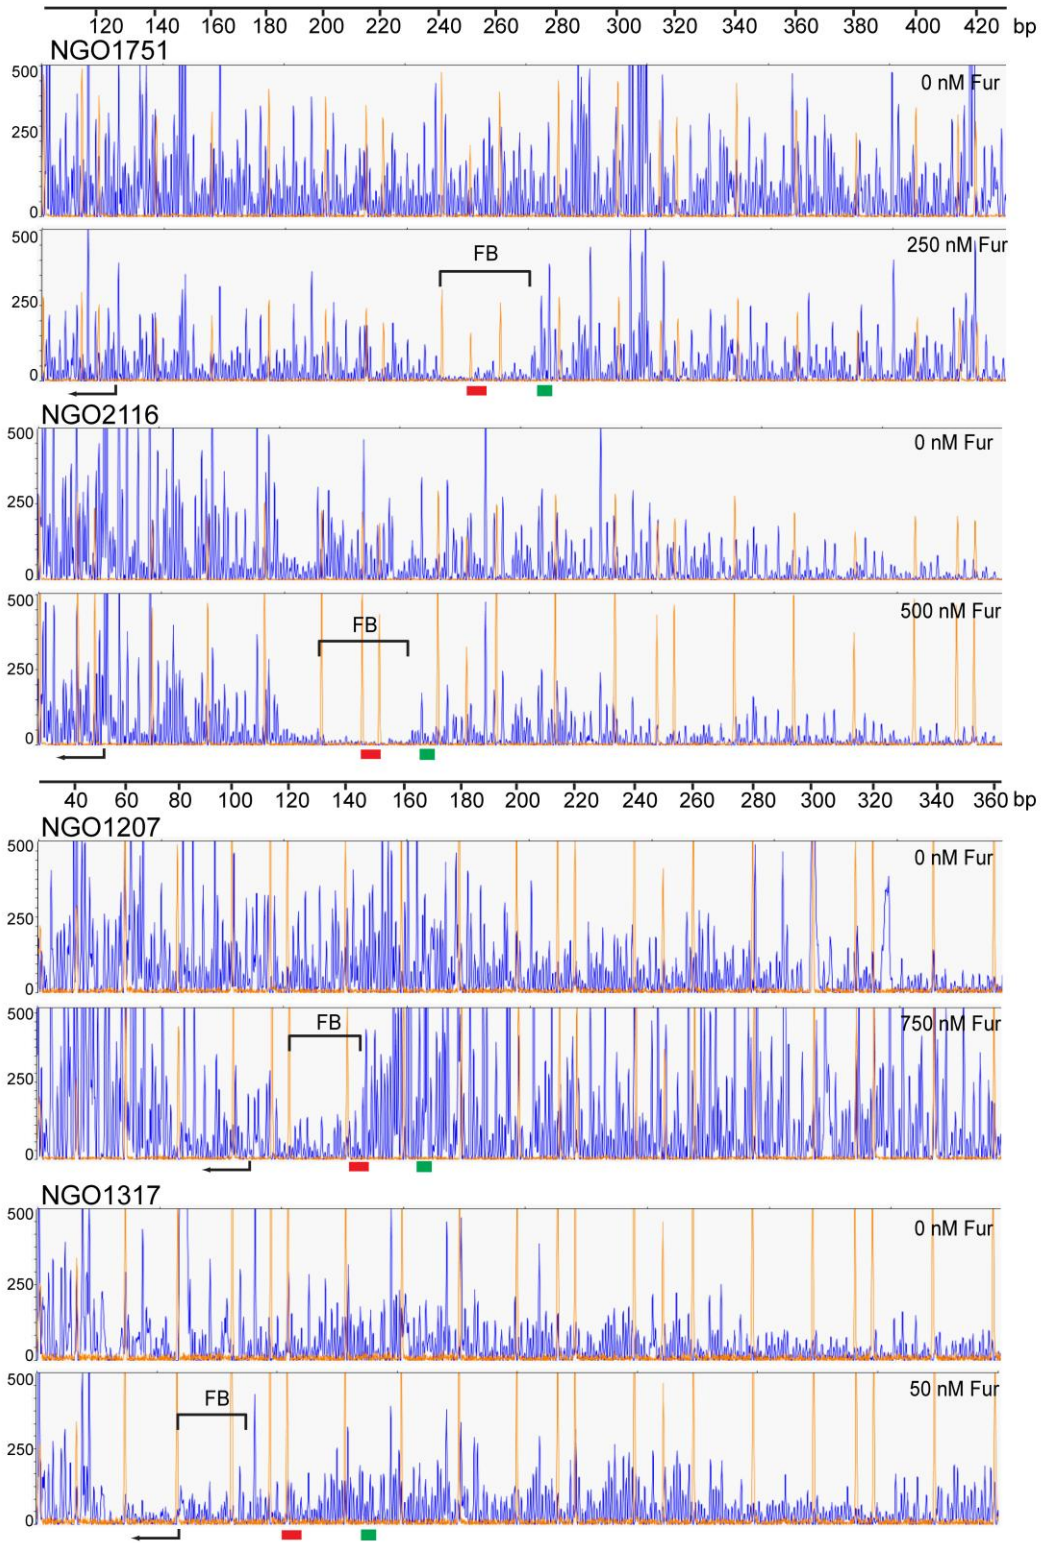



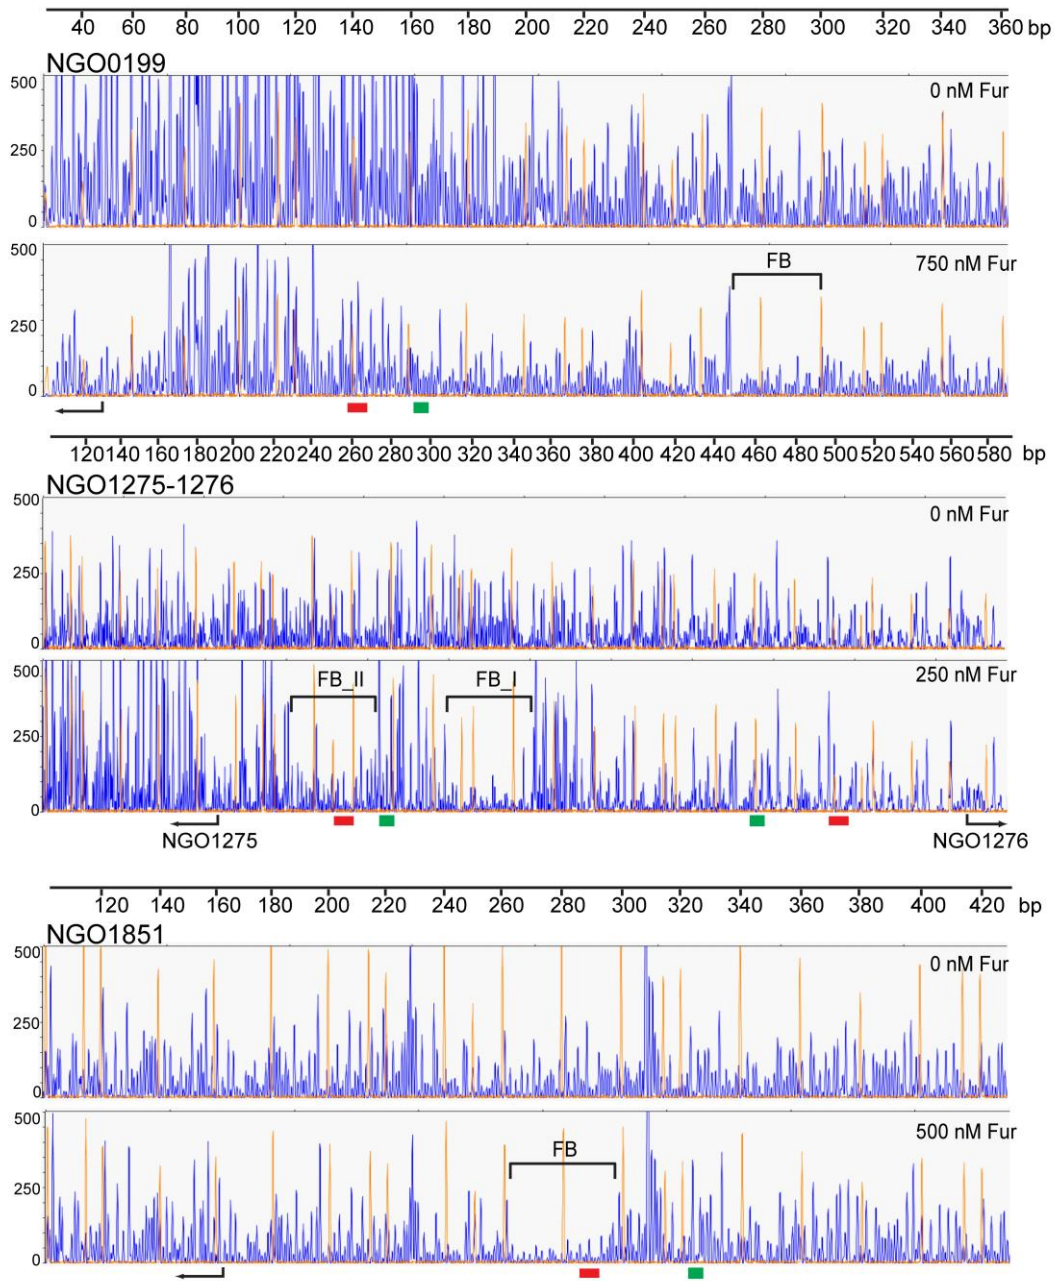

**Supplementary Figure 2. DNase I foot printing of the promoter regions of the Fur activated genes to Fur.** Fur protected regions are indicated by black brackets. The promoter motifs, -10 and -35, predicted by BPR0M were labeled as a red and green box, respectively. The translational start site (ATG) is indicated by an arrow. Since NGO1275 and NGO1276 share the same promoter regions, we used one probe for both genes to demonstrate Fur binding. The gene designations of *N. gonorrhoeae* F62 were assigned according to their homologue in *N. gonorrhoeae* FA1090.
